# Supplementary material
Source: publisher site journal article supplement (https://www.dovepress.com/article/supplementary_file/590934/590934_Supplementary%20Materials.docx)
Supplement: Supplementary file 1 [file 590934_Supplementary%20Materials.docx]

**SUPPLEMENTARY TABLE 1 – LIST OF CODES TO IDENTIFY METASTASIS**

| **Visceral metastasis** | **ICD-9-CM diagnosis codes beginning with** | **ICD-10-CM diagnosis codes beginning with** | |
| --- | --- | --- | --- |
| Adrenal gland | 198.7 | C79.7 | |
| Brain | 198.3 | C79.3 | |
| Digestive system |  |  | |
| Small intestine | 197.4 | C78.4 | |
| Large intestine and rectum | 197.5 | C78.5 | |
| Liver and intrahepatic bile duct | 197.7 | C78.7 | |
| Other digestive organs and spleen | 197.8 | C78.8 | |
| Retroperitoneum and peritoneum | 197.6 | C78.6 | |
| Excretory system |  |  | |
| Kidney and renal pelvis | 198 | C79.0 | |
| Respiratory system |  |  | |
| Lung | 197 | C78.0 | |
| Mediastinum | 197.1 | C78.1 | |
| Pleura | 197.2 | C78.2 | |
| Other respiratory organs | 197.3 | C78.3 | |
| Reproductive system |  |  | |
| Breast | 198.81 | C79.81 | |
| **Lymph node metastasis** | **ICD-9-CM diagnosis codes beginning with** | **ICD-10-CM diagnosis codes beginning with** | |
| Neoplasm of lymph nodes of head, face and neck | 196.0 | C77.0 | |
| Neoplasm of intrathoracic lymph nodes | 196.1 | C77.1 | |
| Neoplasm of intra-abdominal lymph nodes | 196.2 | C77.2 | |
| Neoplasm of axilla and upper limb lymph nodes | 196.3 | C77.3 | |
| Neoplasm of inguinal and lower limb lymph nodes | 196.5 | C77.4 | |
| Neoplasm of intrapelvic lymph nodes | 196.6 | C77.5 | |
| Neoplasm of lymph nodes of multiple regions | 196.8 | C77.8 | |
| Neoplasm of lymph node, unspecified | 196.9 | C77.9 | |
| **Abbreviations**: ICD-9-CM: International Classification of Diseases, 9th Revision, Clinical Modification; ICD-10-CM: International Classification of Diseases, 10th Revision, Clinical Modification. | | |

**SUPPLEMENTARY TABLE 2 – ADVANCED PC-THERAPIES**

| | **Therapy** | **Type** | **Code** | **Definition** | | --- | --- | --- | --- | | **First-generation antiandrogens** | GPI | 21 40 24 20 00 | Bicalutamide | | 21 40 24 60 00 | Nilutamide | | 21 40 24 40 00 | Flutamide | | HCPCS | - | Bicalutamide | | - | Nilutamide | | S0175 | Flutamide | | **Second-generation antiandrogens** | GPI | 21 40 60 10 20 | Abiraterone acetate | | 21 40 24 10 00 | Apalutamide | | 21 40 24 25 00 | Darolutamide | | 21 40 24 30 00 | Enzalutamide | | HCPCS | - | Abiraterone acetate | | - | Apalutamide | | - | Darolutamide | | - | Enzalutamide | | **ADT** | GPI | 21 40 55 25 10 | Degarelix | | 21 40 50 05 00 | Goserelin | | 21 40 50 07 10 | Histrelin | | 21 40 50 10 | Leuprolide | | 21 40 50 50 00 | Triptorelin | | 21 40 55 70 00 | Relugolix | | HCPCS | J9155 | Degarelix | | J9202 | Goserelin | | J1675, J9225, J9226, Q2020, S0133 | Histrelin | | C9430, J1950, J9217, J9218, J9219 | Leuprolide | | C9016, J3315, J3316 | Triptorelin | | - | Relugolix | | **Bone antiresorptive therapies** | GPI | 3004453000 | Denosumab | | GPI | 3004209000 | Zoledronic Acid | | HCPCS | J0897, C9272 | Denosumab | | HCPCS | J3489, J3487, Q2051 | Zoledronic Acid | | **Chemotherapies** | GPI | 21 50 00 05 | Docetexal | | 21 50 00 03 | Cabazitaxel | | 21 20 00 55 | Mitoxantrone | | 21 10 00 20  96 46 58 58 00 (bulk) | Cisplatin | | 21 10 00 15 | Carboplatin | | 21 50 00 10 00  21 50 00 10 60  96 50 80 45 48 (bulk) | Etoposide | | HCPCS | J9171 | Docetexal | | J9043 | Cabazitaxel | | J9293 | Mitoxantrone | | J9060 | Cisplatin | | J9045 | Carboplatin | | J8560, J9181 | Etoposide | | **PARP inhibitors** | GPI | 21 53 55 70 20 | Rucaparib | | 21 53 55 60 00 | Olaparib | | 21 53 55 50 20 | Niraparib | | 21 53 55 80 40 | Talazoparib | | HCPCS | - | Rucaparib | | - | Olaparib | | - | Niraparib | | - | Talazoparib | | **Estrogens** | GPI | 21 40 30 10, 96 48 58 15 57 | Diethylstilbestrol | | 21 40 30 20 | Estramustine phosphate | | 21 40 30 30 | Polyestradiol phosphate | | HCPCS | J9165 | Diethylstilbestrol | | **Immunotherapy** | GPI | 21 35 30 53 | Pembrolizumab | |  | 21 65 10 70 | Sipuleucel-T | | HCPCS | C9027, J9271 | Pembrolizumab | |  | Q2043 | Sipuleucel-T | | **Radiopharmaceuticals** | GPI | 21 60 00 55 | Radium-223 | | 21 60 00 45 80 | Lutetium Lu-177 | | HCPCS | A9606 | Radium-223 | |  | A9607 | Lutetium Lu-177 |   **Abbreviations**: ADT: androgen deprivation therapy; GPI: generic product identifier; HCPCS: Healthcare Common Procedure Coding System; PARP: poly (ADP-ribose) inhibitors; PC: prostate cancer. |
| --- | --- | --- | --- | --- | --- | --- | --- | --- | --- | --- | --- | --- | --- | --- | --- | --- | --- | --- | --- | --- | --- | --- | --- | --- | --- | --- | --- | --- | --- | --- | --- | --- | --- | --- | --- | --- | --- | --- | --- | --- | --- | --- | --- | --- | --- | --- | --- | --- | --- | --- | --- | --- | --- | --- | --- | --- | --- | --- | --- | --- | --- | --- | --- | --- | --- | --- | --- | --- | --- | --- | --- | --- | --- | --- | --- | --- | --- | --- | --- | --- | --- | --- | --- | --- | --- | --- | --- | --- | --- | --- | --- | --- | --- | --- | --- | --- | --- | --- | --- | --- | --- | --- | --- | --- | --- | --- | --- | --- | --- | --- | --- | --- | --- | --- | --- | --- | --- | --- | --- | --- | --- | --- | --- | --- | --- | --- | --- | --- | --- | --- | --- | --- | --- | --- | --- | --- | --- | --- | --- | --- | --- | --- | --- | --- | --- | --- | --- | --- | --- | --- | --- | --- | --- | --- | --- | --- | --- | --- | --- | --- |

**SUPPLEMENTARY TABLE 3 – CASTRATION RESISTANCE ALGORITHM**

Assessment of castration resistance was based on a previously published algorithm incorporating presence of ADT and PSA levels.1 All patients with evidence of castration resistance prior to or on the index date were excluded from this study. Castration resistance was defined using one of the following four criteria with the earliest observed date for any of these criteria defined as the initial castration resistance date:

| **Castration resistance criteria** | **Description** |
| --- | --- |
| ≥1 indicator for CRPC based on provided variables in PPS | The indicator considered one of the following criteria: two consecutive rises in PSA while on continuous luteinizing hormone-releasing hormone therapy for more than six months, the presence of enzalutamide before it received a non-CRPC indication, manual data entry by a clinical user, the presence of the Z19.2 ICD-10-CM diagnosis code, and parsable encounter notes in the EMR where a physician indicated that patients progressed to CRPC. If a patient was considered by at least one of these criteria as castration-resistant, then the patient was identified as castration-resistant. |
| ≥1 diagnosis for castration resistant malignancy status | ≥1 claim with a diagnosis code ICD-10-CM: Z19.2 identified in PPS or KRD+ |
| Surgical castration and ≥1 rise in PSA from post-castration nadir | ≥1 record for bilateral orchiectomy observed at any time before the first observed ARPI used AND ≥2 PSA test results at any time before the first observed ARPI used (including one nadir and one post-nadir) after the procedure, with ≥1 rise in PSA (of ≥25% with an absolute increase of ≥2 ng/mL) after nadir. Nadir was defined as the lowest PSA value observed between the procedures and the first ARPI claim. |
| Medical castration and ≥1 rise in PSA from post-castration nadir | ≥90 days of continuous ADT use observed at any time before the first observed ARPI use AND ≥2 PSA test results at any time before the first observed ARPI used (including one nadir and one post-nadir) within the same episode of continuous ADT, with ≥1 rise in PSA (of ≥25% with an absolute increase of ≥2 ng/mL) after nadir. Nadir was defined as the lowest PSA value observed between the procedures and the first ARPI claim. |

**Abbreviations**: ADT: androgen deprivation therapy; ARPI: androgen receptor pathway inhibitor; CRPC: castration-resistant prostate cancer; EMR: electronic medical records; ICD-10-CM: International Classification of Diseases, 10th Revision, Clinical Modification; KRD+: Komodo Research Database; PPS: Precision Point Specialty; PSA: prostate-specific antigen.

**Reference:**

[1] Freedland SJ, Ke X, Lafeuille MH, et al. Identification of patients with metastatic castration-sensitive or metastatic castration-resistant prostate cancer using administrative health claims and laboratory data. *Curr Med Res Opin*. Apr 2021;37(4):609-622. doi:10.1080/03007995.2021.1879753

**SUPPLEMENTARY TABLE 4 – CODES TO IDENTIFY SALVAGE THERAPY**

| **Procedure** | **CPT** | **HCPCS** |
| --- | --- | --- |
| **Radiation therapy** |  | |
| External beam radiation therapy | 4200F, 4201F, 77401, 77402, 77403, 77404, 77406, 77407, 77408, 77409, 77410, 77411, 77412, 77413, 77414, 77416 | G6003, G6004, G6005, G6006, G6007, G6008, G6009, G6010, G6011, G6012, G6013, G6014 |
| Interstitial prostate brachytherapy | 0394T, 0395T, 55860, 55862, 55865, 55875, 76965, 77750, 77776, 77777, 77778, 77789, 77799, C1716, C1717, C1718, C1719, C1720, C1728, C2638, C2639, C2640, C2641, Q3001 | G0458 |

**Abbreviations**: CPT: Current Procedural Terminology; HCPCS: Healthcare Common Procedure Coding System.

**SUPPLEMENTARY TABLE 5 – RISK CLASSIFICATION OF PATIENTS WITH LPC**

| **TNM Staging** | **Gleason Score** | **PSA** | **Disease risk stratification** |
| --- | --- | --- | --- |
| **T1a to T2a** | 2 to 6 | <10 ng/mL | Low-risk |
| 10 to 20 ng/mL | Intermediate-risk |
| >20 ng/mL | High-risk |
| 7 | ≤20 ng/mL | Intermediate-risk |
| >20 ng/mL | High-risk |
| 8 to 10 | All PSA | High-risk |
| **T2b and T2c** | 2 to 7 | ≤20 ng/mL | Intermediate-risk |
| >20 ng/mL | High-risk |
| 8 to 10 | All PSA | High-risk |
| **T3a and T3b** | Any Gleason | All PSA | High-risk |
| **T4** | Any Gleason | All PSA | High-risk |

**Abbreviations**: LPC: localized prostate cancer; TNM: tumor node metastasis; PSA: prostate-specific antigen.

**SUPPLEMENTARY TABLE 6 – RISK STRATIFICATION ASSESSMENT**

|  |  |  |  | **Low/Intermediate-risk** | | |
| --- | --- | --- | --- | --- | --- | --- |
|  | **Overall** | **High-risk** | **Low/Intermediate-risk** | **Low-risk** | **Intermediate-risk** | **Unknown risk** |
|  | **N=18,971** | **N=7,542** | **N=11,429** | **N=116** | **N=796** | **N=10,517** |
| **Patients with exactly 1 available risk stratification measurea, n (%)** | 2,505 (13.2) | 2,505 (33.2) | 0 (0.0) | 0 (0.0) | 0 (0.0) | 0 (0.0) |
| TNM staging | 339 (13.5) | 339 (13.5) | 0 (0.0) | 0 (0.0) | 0 (0.0) | 0 (0.0) |
| PSA testing | 170 (6.8) | 170 (6.8) | 0 (0.0) | 0 (0.0) | 0 (0.0) | 0 (0.0) |
| Gleason score | 1,996 (79.7) | 1,996 (79.7) | 0 (0.0) | 0 (0.0) | 0 (0.0) | 0 (0.0) |
| **Patients with exactly 2 available risk stratification measuresa, n (%)** | 13,614 (71.8) | 3,831 (50.8) | 9,783 (85.6) | 0 (0.0) | 0 (0.0) | 9,783 (93.0) |
| TNM staging and PSA testing | 339 (2.5) | 339 (8.8) | 0 (0.0) | 0 (0.0) | 0 (0.0) | 0 (0.0) |
| TNM staging and Gleason score | 829 (6.1) | 829 (21.6) | 0 (0.0) | 0 (0.0) | 0 (0.0) | 0 (0.0) |
| PSA testing and Gleason score | 12,446 (91.4) | 2,663 (69.5) | 9,783 (85.6) | 0 (0.0) | 0 (0.0) | 9,783 (100.0) |
| **Patients with exactly 3 available risk stratification measuresa, n (%)** | 2,852 (15.0) | 1,206 (16.0) | 1,646 (14.4) | 116 (100.0) | 796 (100.0) | 734 (7.0) |
| **Patients with TNM staging informationb, n (%)** | 4,359 (23.0) | 2,713 (36.0) | 1,646 (14.4) | 116 (100.0) | 796 (100.0) | 734 (7.0) |
| T1 | 905 (4.8) | 238 (3.2) | 667 (5.8) | 100 (86.2) | 567 (71.2) | 0 (0.0) |
| T2 | 1,372 (7.2) | 393 (5.2) | 979 (8.6) | 16 (13.8) | 229 (28.8) | 734 (7.0) |
| T3 | 2,076 (10.9) | 2,076 (27.5) | 0 (0.0) | 0 (0.0) | 0 (0.0) | 0 (0.0) |
| T4 | 6 (0.0) | 6 (0.1) | 0 (0.0) | 0 (0.0) | 0 (0.0) | 0 (0.0) |
| **Patients with available PSA testsb, n (%)** | 15,807 (83.3) | 4,378 (58.0) | 11,429 (100.0) | 116 (100.0) | 796 (100.0) | 10,517 (100.0) |
| Number of PSA tests, mean ± SD [median] | 1.5 ± 1.0 [1.0] | 1.1 ± 1.0 [1.0] | 1.8 ± 0.9 [2.0] | 1.8 ± 0.9 [2.0] | 1.7 ± 0.9 [1.5] | 1.8 ± 0.9 [2.0] |
| Most recent PSA level, ng/mL, n(%) |  |  |  |  |  |  |
| <2 ng/mL, n (%) | 365 (1.9) | 138 (1.8) | 227 (2.0) | 4 (3.4) | 13 (1.6) | 210 (2.0) |
| ≥2 to <4 ng/mL, n (%) | 1,398 (7.4) | 242 (3.2) | 1,156 (10.1) | 11 (9.5) | 76 (9.5) | 1,069 (10.2) |
| ≥4 to <10 ng/mL, n (%) | 10,455 (55.1) | 2,352 (31.2) | 8,103 (70.9) | 101 (87.1) | 575 (72.2) | 7,427 (70.6) |
| ≥10 to ≤20 ng/mL, n (%) | 2,847 (15.0) | 904 (12.0) | 1,943 (17.0) | 0 (0.0) | 132 (16.6) | 1,811 (17.2) |
| >20 ng/mL, n (%) | 742 (3.9) | 742 (9.8) | 0 (0.0) | 0 (0.0) | 0 (0.0) | 0 (0.0) |
| **Patients with available Gleason scoreb, n (%)** | 18,123 (95.5) | 6,694 (88.8) | 11,429 (100.0) | 116 (100.0) | 796 (100.0) | 10,517 (100.0) |
| ≤6 | 3,169 (16.7) | 223 (3.0) | 2,946 (25.8) | 116 (100.0) | 45 (5.7) | 2,785 (26.5) |
| 7 | 9,511 (50.1) | 1,028 (13.6) | 8,483 (74.2) | 0 (0.0) | 751 (94.3) | 7,732 (73.5) |
| 8 | 3,379 (17.8) | 3,379 (44.8) | 0 (0.0) | 0 (0.0) | 0 (0.0) | 0 (0.0) |
| 9 | 2,006 (10.6) | 2,006 (26.6) | 0 (0.0) | 0 (0.0) | 0 (0.0) | 0 (0.0) |
| 10 | 58 (0.3) | 58 (0.8) | 0 (0.0) | 0 (0.0) | 0 (0.0) | 0 (0.0) |

**Abbreviations**: TNM: tumor node metastasis; PSA: prostate-specific antigen; SD: standard deviation.

**Notes:**

a. Risk was evaluated over the 6 months prior to initiation of definitive therapy.

b. Evaluated during the baseline period, up to and including the index date.

**SUPPLEMENTARY TABLE 7 – DISTRIBUTION OF INVERSE PROBABILITY OF RISK WEIGHTS**

| **IPTW Distribution** | **Clinical outcomes population** | |  | **Cost outcomes population** | |
| --- | --- | --- | --- | --- | --- |
| **High-risk** | **Low/intermediate-risk** |  | **High-risk** | **Low/intermediate-risk** |
| N (study population) | 7,542 | 11,429 |  | 1,488 | 2,572 |
| **Weight distribution** |  |  |  |  |  |
| Mean | 1.00 | 1.00 |  | 1.00 | 1.00 |
| Minimum | 0.41 | 0.63 |  | 0.37 | 0.69 |
| 5th percentile | 0.58 | 0.78 |  | 0.54 | 0.81 |
| 25th percentile | 0.81 | 0.88 |  | 0.79 | 0.89 |
| 50th percentile (median) | 0.96 | 0.97 |  | 0.97 | 0.97 |
| 75th percentile | 1.16 | 1.10 |  | 1.18 | 1.08 |
| 95th percentile | 1.61 | 1.36 |  | 1.68 | 1.35 |
| Maximum | 1.61 | 1.36 |  | 1.68 | 1.35 |

**Abbreviations**: IPTW: inverse probability of treatment weights.

**SUPPLEMENTARY TABLE 8 – PSA TESTING FREQUENCY**

|  | **Unweighted** | | **Weighteda** | |
| --- | --- | --- | --- | --- |
| **High-risk** | **Low/Intermediate-risk** | **High-risk** | **Low/Intermediate-risk** |
| **N=7,542** | **N=11,429** | **N=7,542** | **N=11,429** |
| **Duration of observation period, months, mean ± SD [median]b** | 45.0 ± 23.4 [42.2] | 49.2 ± 23.5 [48.7] | 47.1 ± 23.5 [45.3] | 47.7 ± 23.5 [46.1] |
| Patients with ≥1 valid PSA measurement during the observation period, n (%) | 7,218 (95.7) | 11,043 (96.6) | 7,224 (95.8) | 11,035 (96.5) |
| Time to first PSA test (days), mean ± SD [median] | 86.1 ± 126.0 [53.0] | 78.5 ± 105.1 [52.0] | 86.1 ± 126.0 [53.0] | 78.4 ± 102.9 [52.0] |
| Patients with ≥1 PSA test at specific time points, n (%) |  |  |  |  |
| Within 3 months of index date | 5,096 (67.6) | 7,863 (68.8) | 5,096 (67.6) | 7,844 (68.6) |
| Within 6 months of index date | 6,792 (90.1) | 10,520 (92.0) | 6,792 (90.1) | 10,512 (92.0) |
| Within 9 months of index date | 6,968 (92.4) | 10,787 (94.4) | 6,968 (92.4) | 10,781 (94.3) |
| Within 12 months of index date | 7,050 (93.5) | 10,892 (95.3) | 7,050 (93.5) | 10,888 (95.3) |
| Within 18 months of index date | 7,111 (94.3) | 10,961 (95.9) | 7,111 (94.3) | 10,955 (95.9) |
| Within 24 months of index date | 7,152 (94.8) | 10,987 (96.1) | 7,152 (94.8) | 10,981 (96.1) |
| Within 36 months of index date | 7,188 (95.3) | 11,014 (96.4) | 7,188 (95.3) | 11,008 (96.3) |
| Within 60 months of index date | 7,215 (95.7) | 11,038 (96.6) | 7,215 (95.7) | 11,030 (96.5) |
| Number of follow-up PSA tests per year, mean ± SD [median] | 3.0 ± 2.3 [2.5] | 2.5 ± 2.0 [2.1] | 3.0 ± 2.3 [2.5] | 2.5 ± 2.0 [2.1] |
| Patients with a PSA test every 3 months, on average,c n (%) | 1,527 (21.2) | 1,525 (13.8) | 1,527 (21.2) | 1,575 (14.3) |
| Patients with a PSA test every 6 months, on average,d n (%) | 4,616 (64.0) | 5,871 (53.2) | 4,616 (64.0) | 5,976 (54.2) |
| Patients with a PSA test every 12 months, on average,e n (%) | 6,255 (86.7) | 9,190 (83.2) | 6,255 (86.7) | 9,227 (83.6) |

**Abbreviations**: ADT: androgen deprivation therapy; PC: prostate cancer; PPS: Precision Point Specialty; PSA: prostate-specific antigen; SD: standard deviation.

**Notes:**

a. Propensity scores were generated using probability estimates from a logistic regression models using the following predictors: age (continuous and categorical), ethnicity, geographic region (patients with unknown region were grouped into the west category), payer, year of index date, time between initial PC diagnosis and index date, prior use of ADT, use of first-generation anti-androgen therapy, and baseline Quan-Charlson comorbidity index. Each patient was attributed an inverse-probability of treatment weight that was defined as follows: 1/(propensity score) for the high-risk cohort (treated cohort) and 1/(1-propensity score) for the low-/intermediate-risk cohort (control cohort). Normalized inverse-probability of treatment weights were truncated at the 95th percentiles.

b. PSA tests were assessed over the observation period, defined as the time from the index date until the latest of end of claims activity in the open claim portion of Komodo or clinical activity in PPS (including death), or end of data availability (i.e., 1 August, 2024).

c. Measured as the number of patients with ≥4 PSA tests per year.

d. Measured as the number of patients with ≥2 PSA tests per year.

e. Measured as the number of patients with ≥1 PSA tests per year.

**SUPPLEMENTARY TABLE 9 – TREATMENT PATTERNS**

|  | **Unweighted** | |
| --- | --- | --- |
|  | **High-risk** | **Low/Intermediate-risk** |
| **Treatments during observation perioda** | **N=7,542** | **N=11,429** |
| **Duration of observation period, months, mean ± SD [median]** | 45.0 ± 23.4 [42.2] | 49.2 ± 23.5 [48.7] |
| **Patients with other definitive treatments, n (%)** |  |  |
| EBRT | 2,804 (37.2) | 1,584 (13.9) |
| Brachytherapy | 7 (0.1) | 8 (0.1) |
| Cryotherapy/cyroablation | 1 (0.0) | 3 (0.0) |
| HIFU | 1 (0.0) | 0 (0.0) |
| **Advanced PC-related treatment, n (%)** |  |  |
| ***ARPIs*** | 875 (11.6) | 191 (1.7) |
| Abiraterone acetate | 358 (4.7) | 72 (0.6) |
| Enzalutamide | 347 (4.6) | 88 (0.8) |
| Apalutamide | 258 (3.4) | 46 (0.4) |
| Darolutamide | 99 (1.3) | 17 (0.1) |
| ***Bone antiresorptive therapy*** | 594 (7.9) | 168 (1.5) |
| Denosumab | 545 (7.2) | 147 (1.3) |
| Zoledronic acid | 65 (0.9) | 28 (0.2) |
| ***First-generation antiandrogens*** | 439 (5.8) | 169 (1.5) |
| Bicalutamide | 439 (5.8) | 169 (1.5) |
| Flutamide | 0 (0.0) | 1 (0.0) |
| Nilutamide | 0 (0.0) | 0 (0.0) |
| ***Chemotherapy*** | 162 (2.1) | 62 (0.5) |
| Docetaxel | 129 (1.7) | 23 (0.2) |
| Carboplatin | 46 (0.6) | 24 (0.2) |
| Cabazitaxel | 31 (0.4) | 2 (0.0) |
| Etoposide | 12 (0.2) | 9 (0.1) |
| Cisplatin | 12 (0.2) | 21 (0.2) |
| Mitoxantrone | 5 (0.1) | 0 (0.0) |
| ***Immunotherapy*** | 94 (1.2) | 30 (0.3) |
| Sipuleucel-T | 74 (1.0) | 13 (0.1) |
| Pembrolizumab | 20 (0.3) | 17 (0.1) |
| ***Radiopharmaceuticals*** | 46 (0.6) | 3 (0.0) |
| Radium-223 | 27 (0.4) | 2 (0.0) |
| Lutetium-177 | 21 (0.3) | 2 (0.0) |
| ***PARP inhibitors*** | 20 (0.3) | 0 (0.0) |
| Olaparib | 15 (0.2) | 0 (0.0) |
| Talazoparib | 5 (0.1) | 0 (0.0) |
| Rucaparib | 0 (0.0) | 0 (0.0) |
| Niraparib | 0 (0.0) | 0 (0.0) |
| ***Estrogens*** | 0 (0.0) | 0 (0.0) |
| Estramustine phosphate | 0 (0.0) | 0 (0.0) |
| Diethylstilbestrol | 0 (0.0) | 0 (0.0) |
| Polyestradiol phosphate | 0 (0.0) | 0 (0.0) |

**Abbreviations**: ARPI: androgen receptor pathway inhibitor; EBRT: external beam radiation therapy; HIFU: high-intensity focused ultrasound; PC: prostate cancer; PARP: poly (ADP-ribose) polymerase; PPS: Precision Point Specialty; SD: standard deviation.

**Note:**

a. Treatment patterns were evaluated over the observation period, defined as the time from the index date until the latest of end of claims activity in the open claim portion of Komodo or clinical activity in PPS (including death), or end of data availability (i.e., 31 August, 2024)

**SUPPLEMENTARY FIGURE 1 – BCR ASSESSMENT IN PATIENTS WITH LPC TREATED WITH RP**

**
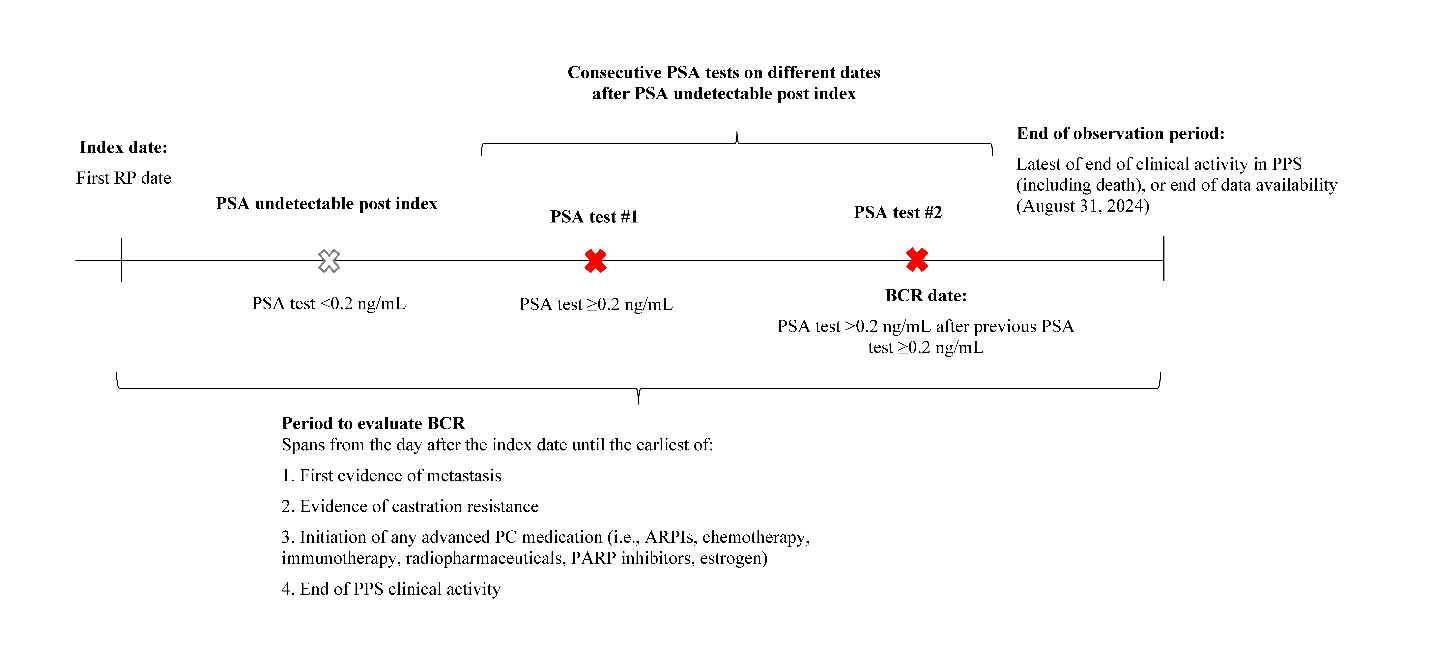
Abbreviations**: ARPI: androgen receptor pathway inhibitor; BCR: biochemical recurrence; LPC: localized prostate cancer; PARP: poly (ADP-ribose) polymerase; PC: prostate cancer; PSA: prostate-specific antigen; PPS: Precision Point Specialty; RP: radical prostatectomy; SD: standard deviation.

**SUPPLEMENTARY FIGURE 2 – KAPLAN-MEIER RATES FOR EVENT-FREE SURVIVAL EXCLUDING SALVAGE THERAPYa**

**
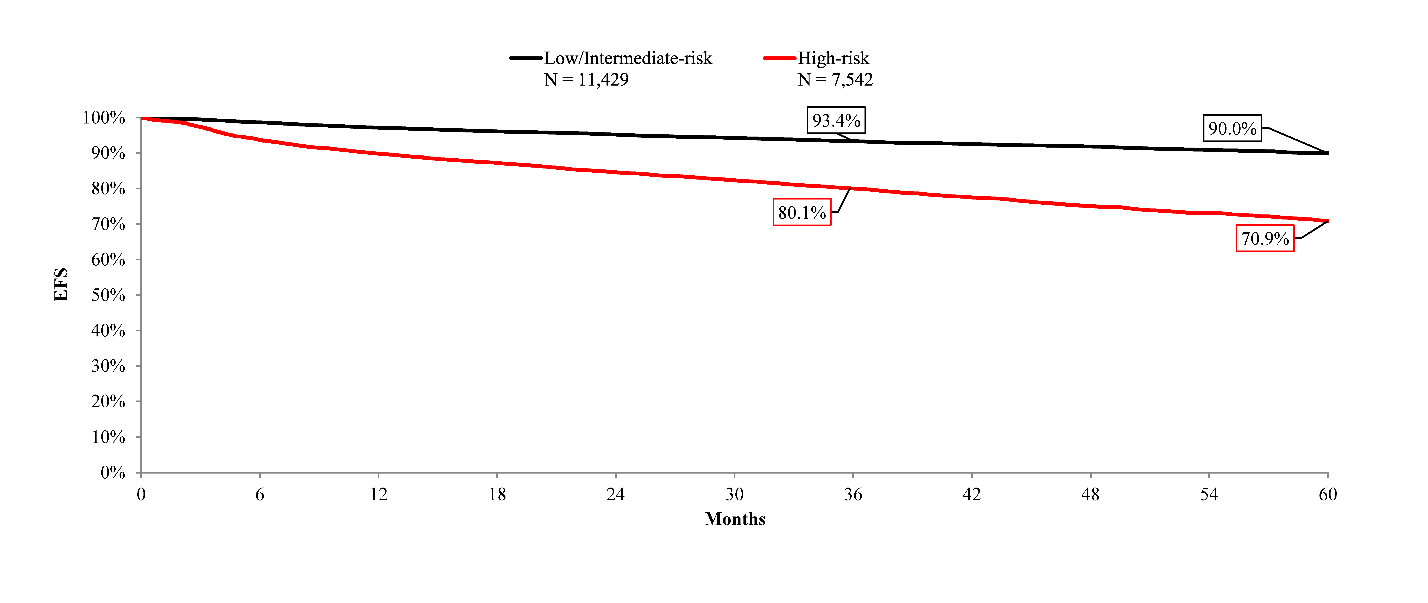
Abbreviations**: BCR: biochemical recurrence; EFS: event-free survival; PPS: Precision Point Specialty.

**Note:**

a. Event-free survival was assessed from the index date to the earliest date of BCR, metastasis or death. For patients still at risk, event-free survival was censored at the latest of end of open insurance claim activity in Komodo or clinical activity in PPS, or end of data availability (i.e., 31 August, 2024).

**SUPPLEMENTARY FIGURE 3 – BALANCE PLOT**


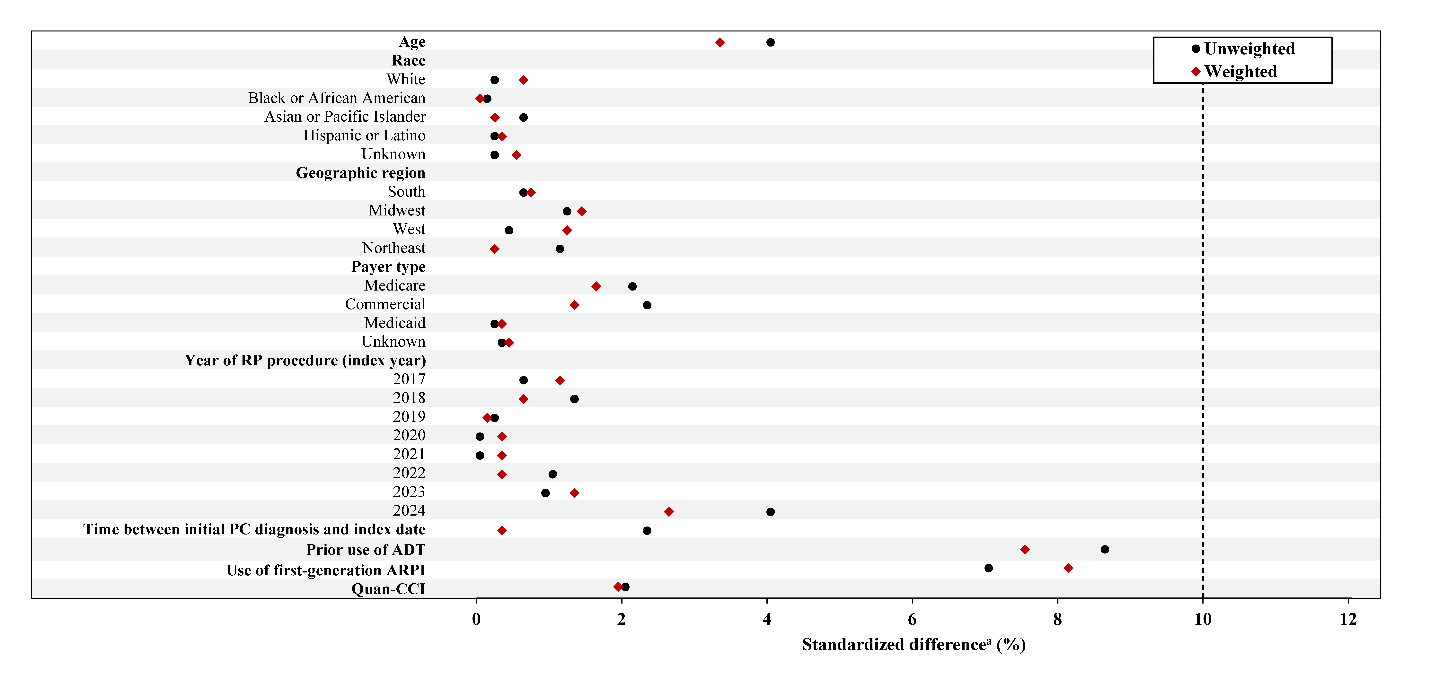


**Abbreviations**: ADT: androgen deprivation therapy; ARPI: androgen receptor pathway inhibitor; CCI: Charlson Comorbidity Index; PC: prostate cancer; RP: radical prostatectomy.

**Note**:

a. For continuous variables, the standardized difference (%) was calculated by dividing the absolute difference in means of the high-risk vs low/intermediate-risk cohort by the pooled standard deviation of both groups. For categorical variables with 2 levels, the standardized difference was calculated using the following equation where P is the respective proportion of participants in each group: (P_high-risk-P_low/intermediate-risk)/√[p_high-risk(1-p_high-risk)/2+p_low/intermediate-risk(1-p_low/intermediate-risk)/2]. A standardized difference of <10% was considered well-balanced.

**SUPPLEMENTARY FIGURE 4 – KAPLAN-MEIER RATES FOR (A) METASTASIS-FREE SURVIVAL AND (B) EVENT-FREE SURVIVAL AMONG PATIENTS WITH ≥2 RISK COMPONENTSa,b**

**
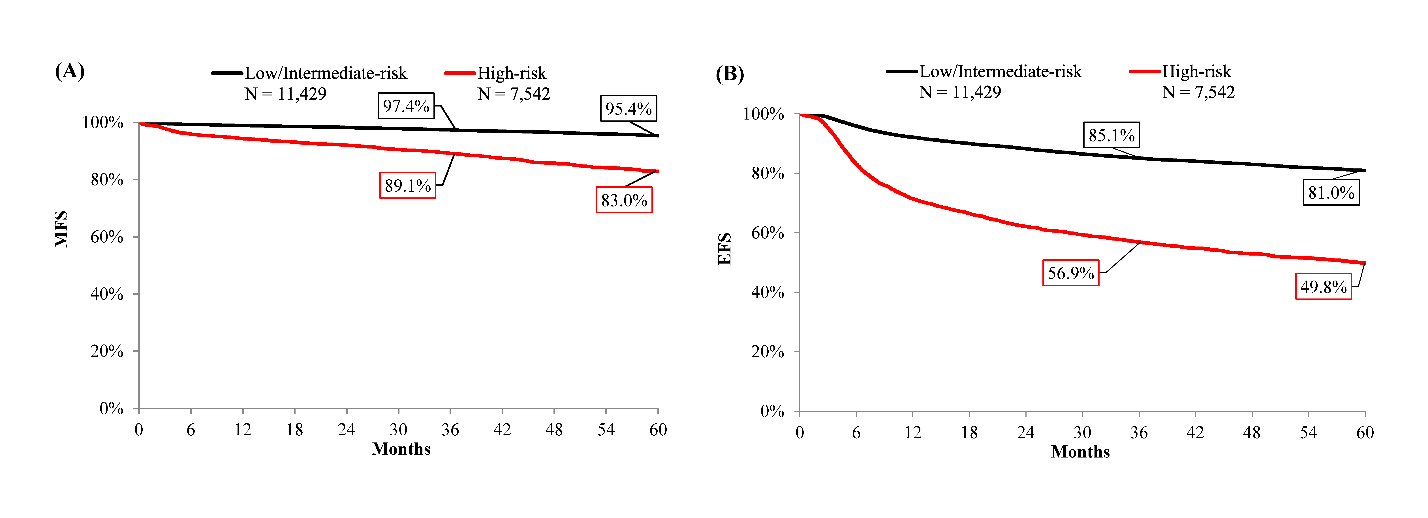
Abbreviations**: BCR: biochemical recurrence; EFS: event-free survival; MFS: metastasis-free survival; PPS: Precision Point Specialty;.

**Notes:**

a. MFS was assessed from the index date to the earliest date of metastasis or death. For patients still at risk, MFS was censored at the latest of end of open insurance claim activity in Komodo or clinical activity in PPS, or end of data availability (i.e., 31 August, 2024).

b. EFS was assessed from the index date to the earliest date of BCR, metastasis or death. For patients still at risk, EFS was censored at the latest of end of open insurance claim activity in Komodo or clinical activity in PPS, or end of data availability (i.e., 31 August, 2024).
